# Supplementary material for: Carbon monoxide cycling in the Ria Formosa Lagoon (southern Portugal) during summer 2021
Source: Copernicus journal article supplement (doi:10.5194/egusphere-2023-771), 2023-05-16
Supplement: Supplementary file 1 [file egusphere-2023-771-supplement.zip]

Archive with 2 entries (2 files):
- egusphere-2023-771-supplement-version1 (2).pdf
- supplement2.pdf
