# Supplementary material for: Carbon monoxide cycling in the Ria Formosa Lagoon (southern Portugal) during summer 2021
Source: Copernicus journal article supplement (doi:10.5194/egusphere-2023-771), 2023-05-16
Supplement: Supplementary file 1 [file egusphere-2023-771-supplement.zip › egusphere-2023-771-supplement-version1 (2).pdf]

# Carbon monoxide cycling in the Ria Formosa Lagoon (southern Portugal) during summer 2021

Guanlin Li<sup>1</sup>, Damian L. Arévalo-Martínez<sup>1, 2</sup>, Riel Carlo O. Ingeniero<sup>1</sup>, Hermann W. Bange<sup>1</sup>

<sup>1</sup>Marine Biogeochemistry, Helmholtz Centre for Ocean Research Kiel, Düsternbrooker Weg 20, 24105 Kiel, Germany

5 <sup>2</sup>now at the Department of Ecological Microbiology, Radboud University Nijmegen, The Netherlands

*Correspondence to:* Guanlin Li (guli@geomar.de)

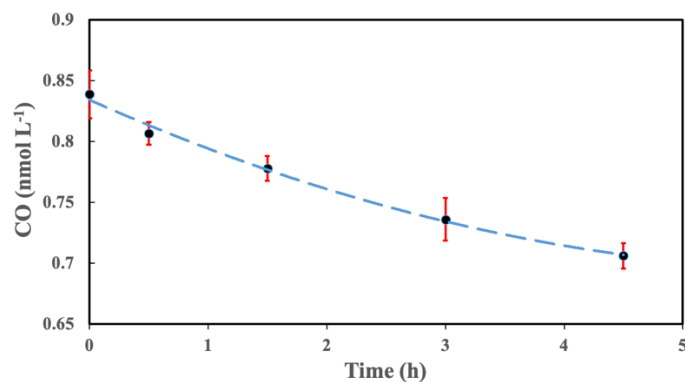

**Figure S1: CO concentrations ( $\pm$  standard error estimate) versus storing time during the cooling box (with ice bags) condition.**
