# Supplementary material for: Carbon monoxide cycling in the Ria Formosa Lagoon (southern Portugal) during summer 2021
Source: Copernicus journal article supplement (doi:10.5194/egusphere-2023-771), 2023-05-16
Supplement: Supplementary file 1 [file egusphere-2023-771-supplement.zip › supplement2.pdf]

# Carbon monoxide cycling in the Ria Formosa Lagoon (southern Portugal) during summer 2021

Guanlin Li<sup>1</sup>, Damian L. Arévalo-Martínez<sup>1, 2</sup>, Riel Carlo O. Ingeniero<sup>1</sup>, Hermann W. Bange<sup>1</sup>

<sup>1</sup>Marine Biogeochemistry, Helmholtz Centre for Ocean Research Kiel, Düsternbrooker Weg 20, 24105 Kiel, Germany

<sup>2</sup>now at the Department of Ecological Microbiology, Radboud University Nijmegen, The Netherlands

Correspondence to: Guanlin Li (guli@geomar.de)

## Dataset

|     | N-Light-A (nmol/L) | N-Light-B (nmol/L) | N-Dark-A (nmol/L) | N-Dark-B (nmol/L) |
|-----|--------------------|--------------------|-------------------|-------------------|
| 0h  | 0.75               | 0.75               | 0.75              | 0.75              |
| 24h | 0.88               | 0.86               | 0.31              | 0.29              |
| 48h | 0.93               | 0.93               | 0.21              | 0.22              |

10

| Station | COsurf | CO eq  | Delta CO | Flux RC01 |
|---------|--------|--------|----------|-----------|
|         | nmol/L | nmol/L | nmol/L   | μmol/m2/d |
| 8       | 0.88   | 0.11   | 0.77     | 1.09      |
| 9       | 0.51   | 0.09   | 0.42     | 0.53      |
| 10      | 0.49   | 0.09   | 0.40     | 0.99      |
| 11      | 0.65   | 0.08   | 0.56     | 1.26      |
| 12      | 1.05   | 0.11   | 0.94     | 2.46      |
| 14      | 0.84   | 0.10   | 0.73     | 2.87      |

15

| Station 7 mic_consumption |             |
|---------------------------|-------------|
| Time(h)                   | CO [nmol/L] |
| 0                         | 1.52        |
| 0.5                       | 1.22        |
| 1                         | 0.99        |
| 2.5                       | 0.57        |
| 4                         | 0.29        |

20

| CO cons [nmol/L] Fig. 2 |       |       |
|-------------------------|-------|-------|
| Station                 | Day-1 | Day-2 |
| 1                       | 0.17  | 3.13  |
| 2                       | 1.78  | 1.14  |
| 3                       | 0.72  | 0.51  |
| 4                       | 0.34  | 0.88  |
| 5                       | 0.28  | 0.54  |
| 6                       | 0.47  | 0.44  |
| 7                       | 0.77  | 0.41  |
| 8                       | 0.61  | 1.20  |
| 9                       | 0.58  | 0.44  |
| 10                      | 0.57  | 0.40  |
| 11                      | 0.58  | 0.71  |
| 12                      | 1.04  | 1.05  |
| 13                      | 0.45  | 0.24  |
| 14                      | 1.01  | 0.68  |
